# Supplementary material for: MOVEIM v1.0: Development of a bottom-up motor vehicular emission inventories for the urban area of Manaus in central Amazon rainforest
Source: Copernicus journal article supplement (doi:10.5194/gmd-2018-81), 2018-06-06
Supplement: Supplementary file [file gmd-2018-81-AC2-supplement.zip]

# MOVEIM v1.0: Development of a bottom-up motor vehicular emission inventories for the urban area of Manaus in central Amazon rainforest.

Paulo Ricardo Teixeira<sup>1,3</sup>, Saulo Ribeiro de Freitas<sup>5</sup>, Francis Wagner Correia<sup>2</sup>, Antonio Ocimar Manzi<sup>4</sup>

<sup>1</sup> Post-graduate Program in Climate and Environment, CLIAMB, INPA/UEA, Av. André Araújo, Manaus, Amazonas, Brazil

<sup>2</sup> State University of Amazonas, Meteorology Department, Manaus, Amazonas, Brazil.

<sup>3</sup> National Institute of Amazonian Research, Large-Scale Biosphere-Atmosphere Experiment in Amazonia, Manaus, Amazonas, Brazil

<sup>4</sup> National Institute of Space Research, Center for Weather Forecasting and Climate Research, Cachoeira Paulista, São Paulo, Brazil

<sup>5</sup> Universities Space Research Association and NASA Goddard Space Flight Center, Greenbelt, MD, USA

*Correspondence to:* Paulo R. Teixeira (paulo.ricardo.teixeira@gmail.com), Saulo R. Freitas (saulo.r.freitas@nasa.gov) and Francis W. da Silva Correa (francis.wagner70@gmail.com).

**Abstract.** Emissions of gases and particulates in urban areas are associated with a mixture from various sources, both natural and anthropogenic. Understanding and quantifying these emissions is necessary in studies of climate change, local air pollution and weather modification issues. Studies have highlighted that the transport sector is key to closing the world's emissions gap. Vehicles contribute substantially to the emission of carbon dioxide (CO<sub>2</sub>), carbon monoxide (CO), nitrogen oxides (NO<sub>x</sub>), non-methane hydrocarbon (NMHC), particulate matter (PM), methane (CH<sub>4</sub>), hydrofluorocarbon (HFC) and nitrous oxide (N<sub>2</sub>O). Several studies show that vehicle emission inventories are an important approach for providing a baseline estimate of on-road emissions in several scales, mainly in urban areas. This approach is essential to areas with incomplete or non-existent monitoring networks as well as for air quality models. Conversely, the direct downscale of global emission inventories in chemical transport and air quality models may not be able to reproduce the observed evolution of atmospheric pollution processes at finer spatial scales. To address this caveat, we developed a bottom-up vehicular emission inventory along the 258 main traffic routes in Manaus, based on local vehicle fleet data and emission factors (EFs). The results showed ed that light vehicles are responsible for the largest fraction of the pollutants and contribute 2.6, 0.87, 0.32, 0.03, 456 and 0.8 ton/h of CO, NO<sub>x</sub>, CH<sub>4</sub>, PM, CO<sub>2</sub> and NMHC, respectively. Our total estimate of the emissions, including the emissions of motorcycles, buses and trucks, was 4.1, 1.0, 0.37, 0.07, 63.5 and 2.56 ton/h, respectively. We also noted that light vehicles account for about 62.8%, 84.7%, 87.9%, 45.1%, 71.8%, and 33.9% and motorcycles in the order of 32.3 %, 6.5 %, 12.1 %, 6.2 %, 14.8 %, 8.7 %, respectively. Nevertheless, we can highlight the bus emissions which are around 35.7% and 45.3 % for NMHC and PM. Our results indicate a better distribution over the domain reflecting the influences of standard behavior of traffic distribution per vehicle category. Finally, this inventory provides more detailed information which may help to improve the current understanding of how vehicle emissions contribute to the pollut<sub>ion</sub> concentrations in Manaus, and their impacts on regional climate change. This work will also contribute to the improve<sub>ment of</sub> air quality numerical simulations, provide more accurate scenarios for policymakers and regulatory agencies when develop<sub>ing</sub> strategies for controlling vehicular emissions, and, consequently, mitigate associated impacts on local and regional scales of the Amazon ecosystems.

**Key words:** Vehicle emission inventories, bottom-up approach, urban air pollution, Amazon forest

## 1 Introduction

Since the pre-industrial era, climate change driven by anthropogenic emissions has become one of the most pressing challenges faced by society. Researchers have highlighted the effects of human activities on air quality, terrestrial ecosystems and global climate changes (Ramanathan et al. 2001; IPCC, 2014; Ashfold et al., 2015). The rapid economic and population growth, combined with a consequential increase in the number of vehicles, has contributed significantly to greenhouse gas (GHG) emissions and other pollutants, and, therefore, affect the climate on a global scale (Chapman, 2007; Stanley et al., 2011) besides causing adverse consequences to human health (Afroz et al., 2003; Abe et al., 2016; Scovronick et al., 2016; Yoshizaki et al., 2017). The GHG emissions associated with the transport sector have increased at a faster rate. Kahn et al. (2007) showed that, in 2004, the transport sector was responsible for 23% of the world's GHG emissions with about 75% coming from road vehicles. Recent studies suggested that, for the atmospheric emissions, the vehicle fleet is globally responsible for 30% of NO<sub>x</sub>, 25% of PM<sub>2.5</sub>, 54% of CO and 14% of CO<sub>2</sub> (Vasconcellos, 2006, Sokhi, 2011; Karangulian et al., 2015). Additionally, Sims et al (2014) showed that in 2010 the GHG emissions from the transport sector continued to increase at a faster rate than any other sector, with 7.0 Gt CO<sub>2eq</sub>. This means that the rate has more than doubled since 1970 (2.9 Gt CO<sub>2eq</sub>). 53% of this increase is from passenger transport and 47% is from freight transport, totaling 5 Gt CO<sub>2eq</sub>. The authors consider that more knowledge is needed on the worldwide potential for GHG emission reductions from the transport sector, and that potential reduction is much more certain for passenger modes. During the United Nations Conference of Parties 21 (UN COP21) Climate Change Conference, it was highlighted that the transportation sector is key to closing the world's emissions gap (Ebinger et al., 2015). The world's emissions gap represents the difference between the emissions levels that countries have pledged to achieve under the Paris Agreement to combat climate change. The main goal is to hold the increase in the global average temperature to below 2°C, when compared to pre-industrial levels and consistent with the global effect of the Intended Nationally Determined Contributions (INDCs) (Rogelj et al., 2016; UNEP, 2017).

However, an air pollution monitoring network in many urban areas is either unavailable or inadequate. Alves et al (2014) suggested that in Brazil only 1.7 % of the cities have an air pollution monitoring network, which represents 1.3 stations per 1 million inhabitants. These numbers are considerably lower than those in the U.S. (16 stations per 1 million inhabitants) and Europe (14.8 stations per 1 million inhabitants). Thus, vehicle emission inventories are a simple and much-needed approach that would provide a baseline estimate of on-road emissions on several scales. This information is essential for areas with incomplete or non-existent monitoring networks (Nagpure and Gurjar, 2012) and to constrain pollutants surface fluxes for numerical air quality models (Coelho et al., 2014; Lozhkina and Lozhkin, 2015; Vara-Vela et al., 2016). As a means of minimizing this gap in the monitoring network, some studies have suggested, in general, two different approaches: top-down and bottom-up. The top-down approach uses values of annual emissions assessed at national levels; these emissions are spatially disaggregated at different levels by statistical indexes (e.g. population density, average number of trips, etc.). However, the 'bottom-up' approach is more accurate and uses data at local and municipal levels (e.g., locally measured emission factors, vehicular activity, fuel consumption, traffic characteristics, fleet characteristics, length of road, etc.). In several studies, both methods are utilized for improving the accuracy of the emissions calculations by applying a downscaling of national emissions, therefore disaggregating atmospheric emissions from the national scale to a city-scale (Kuenen et al., 2014; Janssens-Maenhout et al., 2015; Trombetti et al., 2017). In addition, Dios et al. (2012) suggest combining top-down and bottom-up methodologies for high-resolution inventories. However, despite efforts, Zhou et al (2017) suggested that direct application of downscaled global emission inventories in chemical transport and air quality models may not be a good solution for reproducing the real evolution of atmospheric pollution processes at smaller spatial scales, because the application of downscaling produces emission overestimates.

Recent efforts have been made to develop vehicle emission inventories for several urban areas (Song et al., 2006; Bellasio et al., 2007; Jing et al., 2016; Andrade et al., 2010; Alonso et al., 2010; Venegas et al., 2011; Zhou et al., 2014). A few years ago, in South America, a number of studies reported information on vehicle emission inventories on a national scale or for specific cities. Gallardo et al. (2012) presented an evaluation of vehicle emission inventories for CO and NO<sub>x</sub> in Bogotá (Colombia), Buenos Aires (Argentina), Santiago (Chile) and São Paulo (Brazil). Puliafito et al. (2017), Puliafito et al. (2015), Venegas et al. (2011) suggested a spatial disaggregated emission inventory in high resolution for Argentina. Alonso et al. (2010) developed an urban emissions inventory for South America based on the analysis and aggregation of local inventories of nine megacities by using socio-economic data from the region and correlation between vehicle density and mobile source emissions. This information was extrapolated geographically and distributed using a methodology that delimits urban areas by using high-resolution satellite data and was then integrated into worldwide emissions databases. In Brazil, several studies reported information on vehicle emission inventories in specific cities, such as Brasilia-Federal District (Réquia Júnior et al., 2015); Rio de Janeiro (Duarte et al., 2013); São Paulo (Andrade et al., 2004; Vivanco and Andrade, 2006; Martins et al., 2006; Gallardo et al., 2012); Campinas (Ueda and Tomaz, 2011). However, despite the efforts to implement an air pollution monitoring network on a national scale in the North, Northeast and Midwest regions of Brazil, there are still no emission-specific inventories at local and municipal levels.

In Brazil, in the Northern Region and located in middle of the world's largest rainforest, is the city of Manaus, which stands out for being a large urban area surrounded by primary tropical forests (Martin et al., 2016; Cecchini et al., 2016). Given such an environment, it is paramount to study the impact that Manaus has on atmospheric conditions. Studies have shown that the Amazon rainforest is sensitive to the variability and changes in the climate system due to both natural variations and anthropogenic actions, such as the increase in the concentration of GHG and aerosols in the atmosphere and changes in land use and land cover (LULC) (Fearnside et al., 2002; Artaxo et al., 2006; Betts et al., 2008; de Souza e Alvalá, 2014; Marengo e Espinoza, 2015). Previous studies of emissions have shown the effects of anthropogenic impact on the Amazon basin generally focused on biomass burning-related occasions (Artaxo et al., 2002; Roberts et al., 2003; Andreae et al., 2004; Freud et al., 2008; Martins and Silva Dias, 2009; Artaxo et al., 2013). However, over the last years, several researchers have highlighted the effects of the Manaus plume pollution on the chemical properties of the local and remote atmosphere (Kuhn et al., 2010; Trebs et al., 2012; Rizzo et al., 2013; Bateman et al., 2017). During 2014-2015, the experiment named Observations and Modeling of the Green Ocean Amazon (GoAmazon2014/5) was performed in the metropolitan area of Manaus, the objective was to understand and quantify the impact of the pollution plume from the urban area of Manaus on the complex interactions among vegetation, atmospheric chemistry, and aerosol production, as well as their connections to aerosols, clouds, and precipitation (Martin et al., 2016). As part of the GoAmazon\_2014/5 Experiment, the most recent results indicate that Manaus's pollution plume impacts on the microphysical properties (e.g., smaller effective diameters and higher droplet number concentrations) of warm-phase clouds during the wet season (e.g., Cecchini et al., 2016). In addition, de Sá et al. (2017) suggested that urban pollution is responsible for the increased emissions of nitrogen oxides and decreased particulate matter (PM) compared to background conditions in the Amazon rainforest. The authors indicate that these results corroborate with some future scenarios of Amazonian economic development. In this context, the possible change in PM production would cause alterations in air quality and regional climate.

Therefore, given such an environment, it is essential to quantify sources of mobile emissions in Manaus. Specifically, the purpose of this paper is to develop a vehicular emission inventory along the main traffic routes which will be based on vehicle activity data and local emissions factors using a bottom-up methodology.

## 2 Methodology and data

### 2.1 Brief description of the study area

Manaus is situated at the confluence of the Negro and Solimões Rivers, more precisely between parallels 2°55'00" and 3°10'00" south and the meridians 59°52'30" and 60°07'30" west, occupying a total area of 377 km<sup>2</sup> (Figure 1). With a population of more than 2 million, it is the 7<sup>th</sup> most populous city in Brazil (IBGE, 2015) and responsible for about 80% of the economic activity in the state of Amazonas. Manaus has seen a rapid increase in its vehicle fleet and this is considered one of the major sources of air pollution; during 2010-2016, the average growth rate has been in the order of 7%. The motor vehicle census data from the National Transit Department (DENATRAN) show that in 2010 there were around 453,000 vehicles registered in Manaus. Today, the total is estimated at around 713,000 vehicles (78.6 % of total of the vehicles in the state of Amazonas), which indicates a 57.6% increase. At an annual growth rate of 7%, by 2020 the vehicle fleet could reach 1 million. The fleet in Manaus is relatively young in age and predominantly consists of flexible-fuel vehicles (blend between gasohol and hydrated ethanol); Medeiros et al. (2017) suggested an average age of 5 years attributed to the timing of rapid urban growth during the economic expansion between 2009 and 2015.

Climatologically speaking, in Manaus the mean air temperature does not show strong seasonal variations due to the high incidence of solar radiation throughout the year. The highest temperatures are observed during the dry season, with a September monthly mean of 27.5°C, whereas the lowest temperatures prevail in the rainy season, with a monthly mean of 25.9°C in March. Rainfall in the region shows a pronounced seasonal variation, with the highest amounts in March (335.4 mm) and the lowest amounts in August (47.3 mm), with an average annual total of 2307.4 mm (Andreae et al. 2015). A typical characteristic for the central Amazon Basin is the synoptic changes between the wet and dry seasons; a good example of this is in the seasonal variations of the IntraTropical Convergence Zone (ITCZ) (Fisch et al., 1998; Wang and Fu 2007; Nobre et al., 2009). In the wet season, the Manaus plume aside, the Amazon basin is one of the cleanest continental regions on Earth (Andreae, 2007; Martin et al., 2010). In general, the preferential wind direction is from the Northeast (NE), and features the occurrence of the breeze circulation in the same direction as the trade winds. Santos et al. (2014) observed that during the wet season, the trade winds flow more frequently from the Northeast (NE), while in the dry season they flow from the Southeast (SE). It has been suggested that these features are modulated by a land breeze circulation that is induced by the thermal gradient between Manaus and the surface of the river.

### 2.2 General methodology description

In this study, we applied a bottom-up approach in order to develop a vehicular emission inventory for the main anthropogenic emissions of an urban area: carbon monoxide (CO), nitrogen oxide (NO<sub>x</sub>), methane (CH<sub>4</sub>), particulate matter (PM), carbon dioxide (CO<sub>2</sub>) and non-methane hydrocarbon (NMHC). Thus, for each segment of road, we established an hourly traffic profile for each vehicle category. The emissions were calculated as follows in Eq. (1):

$$E_{i,j}^p = \sum_c EF_c^p \times VTK_{c,i,j} \times 10^{-3} \quad (1),$$

150 where  $E_{i,j}^p$  is the emitted mass of a pollutant  $p$  on a segment of road  $i$  at time  $j$  ( $\text{kg h}^{-1}$ );  $EF_c^p$  is the emission factor of pollutant  $p$  by a vehicle category  $c$  ( $\text{g km}^{-1}$ );  $VTK_{c,i,j}$  is distance travelled of a vehicle category  $c$  on a segment of road  $i$  at time  $j$  ( $\text{km h}^{-1}$ ).

Due to the significant differences among different vehicle classifications, the emission factors were separated by the vehicle category. However, it was not possible to determine the exact age and fuel type of vehicle on a segment of road  $i$  at the moment of  $j$ . Thus, we used the existing classification method established by the Brazilian Ministry of Environment by which the vehicles have been summarized into 4 classes as follows: light vehicle - LV (e.g., passenger car, taxi); motorcycle; public transportation bus, and heavy goods vehicle - HDV (e.g., truck). The grouping intends to reflect the different fuels used and fleet-based functions for private and public transport, or transport of goods.

160 The method used to calculate VKT at the given time  $j$  for a segment of road  $i$  is to multiply the length of a road segment ( $L_i$ ) by the volume of traffic of category  $c$  on that segment  $i$  at a given time  $j$ , as shown by Eq. (2):

$$VTK_{c,i,j} = VT_{c,i,j} \times L_i \quad (2).$$

165 It is important to note that the VKT calculation does not include travel on all roads in Manaus. Small residential streets are not used in the VKT calculation; the traffic volume varies or the traffic count sample on these roadways is too small or frequently inexistent to make a reliable estimate.

## 2.2 Traffic flow, vehicle activity, vehicle density and emission factors

170 The fleet composition, vehicle activity, density and traffic flow were obtained from three local sources: The Amazonas state Transit Department (Detran-AM); the Manaus Municipal Institute of Engineering and Traffic Control (MIETCM) and the Municipal Institute of Urban Planning. For the traffic volume, a database from the MIETCM was used, and we obtained data by manually counting vehicles along the 258 main traffic routes from Manaus, representing 85% of the roads likely to have high emission contribution, over two time periods: morning rush hour (6–9 AM) and afternoon rush hour (5–7 PM). The counting was done over several days on each road between the years 2014-2015. Thus, for every selected road, the vehicle flow was continuously counted in 15-minute intervals during these two-hour periods. In most Brazilian cities, the traffic volume is monitored only during the peak hours, furthermore in Manaus urban area the traffic volume doesn't show strong variations during the day-time. Thus, the off-peak periods is not considered in this study.

180 The accuracy of the emission factors (EFs) is fundamental and affects the results of the vehicle emissions inventories. International EFs are hard to match perfectly since they are directly related to characteristics such as vehicle emission control level, fuel type, vehicle age, accumulated mileage, inspection and maintenance, average speed, fraction of cold/hot starts, etc. Some studies have quantified EFs by employing tunnel measurements (Martins et al., 2006; Ban-Weiss et al., 2010) or the remote sensing approach (Bishop et al., 2010). Despite the efforts to improve EFs, both of these approaches have significant limitations. Hudda et al. (2013) summarizes that tunnel measurements cannot provide variability showing only a central tendency. In contrast, remote sensing only allows for determining an individual vehicle's EF unless large numbers of locations are sampled in a representative manner. Therefore, in this research, we used the emission factors suggested by Cancelli and Dias (2014) which were based on data from the Environmental Agency of São Paulo (CETESB) and the first National Atmospheric Emissions from the Road Vehicles Inventory developed by the Brazilian Ministry of the Environment (MMA, 2011), which were determined for Brazilian vehicles (Table 1).

## 2.3 Spatial Evaluation

To spatial distribution was been compared with values of Emission Database for Global Atmospheric Research harmonized (EDGAR-HTAP, <http://edgar.jrc.ec.europa.eu/htap>, Janssens-Maenhout et al., 2012); REanalysis of the TROpospheric chemical composition over the past 40 years (RETRO, <http://retro.enes.org>) and the urban emissions inventory for South America (Alonso et al, 2010). Thus, version 1.5 of the PREP-CHEM-SRC system (<ftp://ftp.cptec.inpe.br/brams/PREP-CHEM/PREP-CHEM-SRC-1.5.tar.gz>) was utilized to standardize the emission inventories at a 1km horizontal resolution. PREP-CHEM-SRC is a comprehensive tool that aims to prepare emission fields of trace gases and aerosols for use in atmospheric-chemistry transport models (Freitas et al., 2011).

## 3 Results and discussion

This section introduces our bottom-up vehicle emission inventory for the Manaus urban area, which resulted from applying the methodology described above and locally collected data and information. Traffic density has been intensively monitored for a number of years in the Manaus urban area, however, we only considered the data for years 2014 and 2015. Figure 2 shows the traffic density for light vehicles, motorcycles, buses and trucks, for the 258 roads which were analysed. The thickness of the line on the map relates to the amount of traffic. The map indicates a preferential direction of light vehicles, bus and trucks, while motorcycles show a more homogenous distribution.

Table 2 shows a statistical summary of vehicle emissions from different categories over the study area. The totals of emissions are 4.1, 1.0, 0.37, 0.072, 63.5 and 2.56 ton/h for CO, NO<sub>x</sub>, CH<sub>4</sub>, PM, CO<sub>2</sub> and NMHC, respectively. From these totals the light vehicles are responsible for a large proportion of the pollutants, and contribute 2.6, 0.87, 0.32, 0.03, 456 and 0.8 tons/h.

We noted that light vehicles represent about ~62.8 %, 84.7 %, 87.9 %, 45.1 %, 71.8 %, and 33.9 % and motorcycles in the order of 32.28 %, 6.54 %, 12.06 %, 6.19 %, 14.77 %, and 8.71 %. Nevertheless, we can highlight the bus emissions which are around ~35.74% and 45.27% for NMHC and PM, respectively (Table 3). Réquia Junior et al (2015) found light vehicle emissions values in Brasilia - Brazil to be equal to 68.9 % of CO, 93.6 % of CH<sub>4</sub> and 57.9 % of CO<sub>2</sub>, and for heavy vehicles (bus and trucks) observed values were in the order of 92.9 % and 97.4 % for NHMC and PM, respectively. In a recent study by Silva et al. (2016) which was conducted in Pelotas, Brazil, results suggested that light vehicles and motorcycles contribute ~63 % and 28 % of CO, respectively, while light vehicles, heavy vehicles (bus and trucks) and motorcycles contribute 72 % of NMHC, 76 % of NO<sub>x</sub> and 18 % of NMHC. Duarte et al. (2013) suggested that light vehicles in Rio de Janeiro, Brazil, contribute 60 % of CO, 17 of NO<sub>x</sub> and 2.9 of PM, while motorcycles and heavy vehicles emit 90 % and 5.9 %, respectively. In addition, Ueda and Tomaz (2011), using information from Campinas, Brazil, showed that light vehicles are responsible for 74 % of CO, while 61 % of NO<sub>x</sub> and 99.9 % of PM are associated with heavy vehicles.

Figures 3 and 4 show the spatial distributions from the emission inventories of CO and NO<sub>x</sub> for four vehicle categories. Although the spatial distribution trends of the pollutants' emissions are similar, there are some differences between categories of vehicles. Analyses of the distribution of emissions show that they are mostly higher in central zones due to the high traffic rate of passenger cars, motorcycles, buses and trucks. This pattern was observed in the results shown in Figure 2. It is worth noting that trucks are not allowed to enter residential areas, which leads to a considerable level of truck-related emissions on suburban roads around Manaus and in industrial areas.

To evaluate uncertainty in the spatial distribution and total emission in the urban area of Manaus, we compared the inventory proposed here (Local inventory - LI) with values of EDGAR-HTAP, RETRO and Alonso et al (2010). Despite the efforts to



improve the level of detail, significant uncertainties still remain because different approaches are adopted for different spatial disaggregation methods, different resolutions, different criteria and others. For the urban area of Manaus Alonso et al (2010) suggested CO and NO<sub>x</sub> values of 23.93 and 10.16 Gg year<sup>-1</sup>, respectively. In contrast, the present results show values of CO and NO<sub>x</sub> around 67.34 and 32.86 Gg year<sup>-1</sup>. In general, for the study area, all databases that were utilized underestimated the total emissions of CO and NO<sub>x</sub> emissions presented in LI by a factor of ~3. Similar results were found by Abdallah et al. (2016) for Lebanon-Middle East. The comparison of EDGAR-HTAP, RETRO and Alonso et al. (2010) over Manaus highlights the discrepancies between the inventories, both in terms of total mass and in spatial distribution. In LI emissions we show a better distribution over the domain, highlighting major urban roads (Figure 5). The differences between the totals and the spatial distribution may be related to the methods applied, but also they have a direct relationship with the size of the urban area and number of vehicles considered in the studies. For example, for Manaus, Alonso et al. (2010) utilized an area of ~265.32 km<sup>2</sup> and a total of around 581,000 vehicles, in contrast, for the inventory proposed here, we used an area of ~447 km<sup>2</sup> and a total of around 622,000 vehicles.

#### 4 Conclusion

This paper introduces a detailed bottom-up vehicular emission inventory developed for Manaus, the capital of the Amazonas state (Brazil), based on local information and on the city scale. The estimated mobile emissions of CO, NO<sub>x</sub>, CH<sub>4</sub>, PM, CO<sub>2</sub> and NMHC are approximately 4.1, 1.0, 0.37, 0.072, 63.5 and 2.56 ton/h, respectively. In agreement with previous studies over different regions, light vehicles are mainly responsible for the total emissions, and account for approximately 62.8 %, 84.7 %, 87.9 %, 45.1 %, 71.8 %, and 33.9 % of the respective total mass of the above pollutants. Motorcycles come in second place producing with 32.3%, 6.5%, 12.1%, 6.2%, 14.8%, and 8.7% of the total mass. However, we can highlight the bus emissions which are ~35.74% and 45.27% for NMHC and PM, respectively. Our results indicate that the developed inventory reflects the influences of standard behavior of traffic distribution per vehicle category and better distribution over the domain. Furthermore, this inventory provides more accurate information which will improve the current understanding on how vehicle emissions contribute to the ambient pollutant concentrations, the direct and indirect impacts on regional climate changes and provides more detailed scenarios for policymakers and regulatory agencies in order to develop strategies for controlling vehicular emissions and, consequently, mitigate associated impacts on local and regional scales of the Amazon ecosystems.

#### Code and data availability

Most of the parts that comprise this methodology are publically available. The source code of PREP-CHEM-SRC is maintained and developed by the National Institute of Space Research, Center for Weather Forecasting and Climate Research by the GMAI group (Group Modeling of the Atmosphere and its Interfaces). The code and most of the global and South American emission database are available upon request to the 2nd author or can be downloaded from the <ftp://ftp.cptec.inpe.br/brams/PREP-CHEM/PREP-CHEM-SRC-1.5.tar.gz>. The new inventory and source code are currently being implemented within the PREP-CHEM-SRC, researchers will be able to access its code and database used in this study, as well as more recent versions, available upon request at no cost, via repository in <https://doi.org/10.5281/zenodo.1245811>. In addition, researcher interested in the new motor vehicle emission inventory for Manaus urban area and source code is encouraged to contact the corresponding author.

## Acknowledgments

This work is part of the PhD thesis of the first author that is under development at the Post-Graduate Program in Climate and Environment (PPG-CLIAMB) of the National Research Institute of the Amazon (INPA) and the Amazonas State University (UEA) with financial support from Coordination for the Improvement of Higher Education Personnel (CAPES). We acknowledge the support of the Central Office of the Large-Scale Biosphere Atmosphere Experiment in Amazonia (LBA), the National Institute of Research of Amazônia (INPA), National Institute of Space Research (INPE), Center for Weather Forecasting and Climate Research (CPTEC) and the Amazonas State University. We also thank Group Modeling of the Atmosphere and its Interfaces (GMAI) - CPTEC. The first author thanks the CAPES for the grant scholarship, linked to PPG-CLIAMB. Thanks also go to Amy Houghton for their very valuable comments to improve this work.

## References

- Abe, K. and Miraglia, S.: Health Impact Assessment of Air Pollution in São Paulo, Brazil. *Int. J. Environ. Res. Public Health*, 13, 694, doi: 10.3390/ijerph13070694, 2016.
- Abdallah, C., Sartelet, K. and Afif, C.: Influence of boundary conditions and anthropogenic emission inventories on simulated O<sub>3</sub> and PM<sub>2.5</sub> concentrations over Lebanon, *Atmospheric Pollution Research*, Vol. 7, Issue 6, 971-979, 2016.
- Afroz R., Hassan, M. N. and Ibrahim, N. A.: Review of air pollution and health impacts in Malaysia. *Environ Res*, 92, 71–77. doi: 10.1016/S0013-9351(02)00059-2, 2003.
- Alonso, M. F., Longo, K. M., Freitas, S. R., Fonseca, R. M., Marçal, V., Pirre, M. and Klenner, L. G.: An urban emissions inventory for south america and its application in numerical modeling of atmospheric chemical composition at local and regional scales. *Atmos. Environ.*, 44, 5072–5083, doi: 10.1016/j.atmosenv.2010.09.013, 2010.
- Alves, E. M. P., Costa, R. R., Braga, A. A., Miranda, M., Nascimento, N. C. and Saldiva, P. H. N.: Monitoramento da qualidade do ar no Brasil. São Paulo: Instituto Saúde e Sustentabilidade, 2014.
- Andrade, M., Ynoue, R., Harley, R. and Miguel, A.: Air Quality Model Simulating Photochemical Formation of Pollutants: The São Paulo Metropolitan Area Brazil *Int. J. Environ. Pollut.*, 22 (4), 460-475, 2004.
- Andrade, M. F., Miranda, R. M., Fornaro, A., Kerr, A., Oyama, B., Andre, P.A. and Saldiva, P.: Vehicle emissions and PM<sub>2.5</sub> mass concentrations in six Brazilian cities. *Air Quality Atmosphere & Health*, doi: 10.1007/s11869-010-0104-5, 2010.
- Andreae, M. O., Rosenfeld, D., Artaxo, P., Costa, A. A., Frank, G. P., Longo, K. M., and Silva-Dias, M. A. F.: Smoking rain cloud over the Amazon, *Science*, 303, 1337–1342, 2004.
- Andreae, M. O.: Aerosols before pollution. *Science*, 315, 50-51, 2007.
- Andreae, M. O., Acevedo, O. C., Araújo, A., Artaxo, P., Barbosa, C. G. G., Barbosa, H. M. J., Brito, J., Carbone, S., Chi, X., Cintra, B. B. L., da Silva, N. F., Dias, N. L., Dias-Júnior, C. Q., Ditas, F., Ditz, R., Godoi, A. F. L., Godoi, R. H. M., Heimann, M., Hoffmann, T., Kesselmeier, J., Könemann, T., Krüger, M. L., Lavric, J. V., Manzi, A. O., Lopes, A. P., Martins, D. L., Mikhailov, E. F., Moran-Zuloaga, D., Nelson, B. W., Nölscher, A. C., Santos Nogueira, D., Piedade, M. T. F., Pöhlker, C., Pöschl, U., Quesada, C. A., Rizzo, L. V., Ro, C.-U., Ruckteschler, N., Sá, L. D. A., Sá, M. O., Sales, C. B., dos Santos, R. M. N., Saturno, J., Schöngart, J., Sörgel, M., de Souza, C. M., de Souza, R. A. F., Su, H., Targhetta, N., Tota, J., Trebs, I., Trumbore, S., van Eijck, A., Walter, D., Wang, Z., Weber, B., Williams, J., Winderlich, J., Wittmann, F., Wolff, S., and Yáñez-Serrano, A. M.: The Amazon Tall Tower Observatory (ATTO): overview of pilot measurements on ecosystem ecology, meteorology, trace gases, and aerosols, *Atmos. Chem. Phys.*, 15, 10723-10776, doi:10.5194/acp-15-10723-2015, 2015.
- Artaxo, P., Oliveira, P., Lara, L. L., Pauliquevis, T. M., Rizzo, L. V., Pires, C., Paixão, M. A., Longo, K. M., Freitas, S. and Correia, A. L.: Efeitos climáticos de partículas de aerossóis biogênicos e emitidos em queimadas na Amazônia. *Revista Brasileira de Meteorologia (Impresso)*, 21, 1-22, 2006.



- Artaxo, P., Martins, J. V., Yamasoe, M. A., Procópio, A. S., Pauliquevis, T. M., Andreae, M. O., Gunyon, P., Gatti, L. V., and Leal, A. M. C.: Physical and chemical properties of aerosols in the wet and dry seasons in Rondônia Amazônia, *J. Geophys. Res.*, 107, 1–14, doi: 10.1029/2001JD000666, 2002.
- 305 Artaxo, P., Rizzo, L. V., Brito, J. F., Barbosa, H. M. J., Arana, A., Sena, E. T., Cirino, G. G., Bastos, W., Martin, S. T. and Andreae, M. O.: Atmospheric aerosols in Amazonia and land use change: from natural biogenic to biomass burning conditions. *Faraday Discuss.*, 165, 203, 2013.
- Ashfold, M. J., Pyle, J. A., Robinson, A. D., Meneguz, E., Nadzir, M. S. M., Phang, S. M., Samah, A. A., Ong, S., Ung, H. E., Peng, L. K., Yong, S. E., and Harris, N. R. P.: Rapid transport of East Asian pollution to the deep tropics, *Atmos. Chem. Phys.*, 15, 3565–3573, doi:10.5194/acp-15-3565-2015, 2015.
- 310 Ban-Weiss, G. A., Lunden, M. M., Kirchstetter, T. W., and Harley, R. A.: Size-resolved particle number and volume emission factors for on-road gasoline and diesel motor vehicles, *J. Aerosol Sci.*, 41, 5–12, 2010.
- Bateman, A. P., Gong, Z., Harder, T. H., de Sá, S. S., Wang, B., Castillo, P., China, S., Liu, Y., O'Brien, R. E., Palm, B. B., Shiu, H.-W., Cirino, G. G., Thalman, R., Adachi, K., Alexander, M. L., Artaxo, P., Bertram, A. K., Buseck, P. R., Gilles, M. K., Jimenez, J. L., Laskin, A., Manzi, A. O., Sedlacek, A., Souza, R. A. F., Wang, J., Zaveri, R., and Martin, S. T.: Anthropogenic influences on the physical state of submicron particulate matter over a tropical forest, *Atmos. Chem. Phys.*, 17, 1759–1773, doi:10.5194/acp-17-1759-2017, 2017.
- 315 Bellasio, R., Bianconi, R., Corda, G. and Cucca, P.: Emission inventory for the road transport sector in Sardinia (Italy). *Atmos. Environ.* 41 (4), 677–691. <https://doi.org/10.1016/j.atmosenv.2006.09.017>, 2007.
- Betts, R., Sanderson, M. and Woodward, S.: Effects of large-scale Amazon forest degradation on climate and air quality through fluxes of carbon dioxide, water, energy, mineral dust and isoprene. *Phil. Trans. R. Soc. B*, 363, 1873–1880, 2008.
- 320 Bishop, G. A., Peddle, A. M., Stedman, D. H., and Zhan, T.: Onroad emission measurements of reactive nitrogen compounds from three California cities, *Environ. Sci. Technol.*, 44, 3616–3620, 2010.
- Cancelli, D. M. and Dias, N. L. BRevê: uma metodologia objetiva de cálculo de emissões para a frota brasileira de veículos. *Eng. Sanit. Ambient.*, Rio de Janeiro, 19, n. spe, 13–20, 2014.
- 325 Cecchini, M. A., Machado, L. A. T., Comstock, J. M., Mei, F., Wang, J., Fan, J., Tomlinson, J. M., Schmid, B., Albrecht, R., Martin, S. T., and Artaxo, P.: Impacts of the Manaus pollution plume on the microphysical properties of Amazonian warm-phase clouds in the wet season, *Atmos. Chem. Phys.*, 16, 7029–7041, doi:10.5194/acp-16-7029-2016, 2016.
- Chapman, L.: Transport and Climate Change: A Review. *Journal of Transport Geography*, 15, 354–367, 2007.
- 330 Coelho, M. C., Fontes, T., Bandeira, J. M., Pereira, S. R., Tchepel, O., Dias, D., Sá, E., Amorim, J. H. and Borrego, C.: Assessment of potential improvements on regional air quality modelling related with implementation of a detailed methodology for traffic emission estimation. *Sci. Total Environ.* 470–471, 127–137. doi: 10.1016/j.scitotenv.2013.09.042, 2014.
- de Sá, S. S., Palm, B. B., Campuzano-Jost, P., Day, D. A., Newburn, M. K., Hu, W., Isaacman-VanWertz, G., Yee, L. D., Thalman, R., Brito, J., Carbone, S., Artaxo, P., Goldstein, A. H., Manzi, A. O., Souza, R. A. F., Mei, F., Shilling, J. E., Springston, S. R., Wang, J., Surratt, J. D., Alexander, M. L., Jimenez, J. L., and Martin, S. T.: Influence of urban pollution on the production of organic particulate matter from isoprene epoxydiols in central Amazonia, *Atmos. Chem. Phys.*, 17, 6611–6629, <https://doi.org/10.5194/acp-17-6611-2017>, 2017.
- 335 de Souza, D. O. and Alvalá, R. C. dos S.: Observational evidence of the urban heat island of Manaus City, Brazil. *Met. Apps*, 21, 186–193. doi: 10.1002/met.1340, 2014.
- Dios, M., Souto, J. A., Casares, J. J., Gallego, N., Saez, A., Macho, M. L., Cartelle, D. and Vellon, J. M.: A mixed top-down and bottom-up methodology in spatial segregation of emissions based on GIS tools. *Proceedings of the Air Pollution 2012 Conference*, A Coruña, Spain, 2012.
- 340 Duarte, C., Souza, R de, Silva, S. D., Aure, M., Agosto, D. A. D. and Barboza, A. P.: Inventory of conventional air pollutants emissions from road transportation for the state of Rio de Janeiro. *Energy Policy* 25 (20), 2013.

- 345 Ebinger, J., Peltier, N., Gitay, H., Monsalve, C., Losos, A., Rogers, J. A. and Vandycke, N.: Transport at COP21: Part of the Climate Change Solution. Connections; No. 28. World Bank, Washington, DC. © World Bank, 2015.
- Fearnside, P. M.: Fogo e emissão de gases de efeito estufa dos ecossistemas florestais da Amazônia brasileira. *Estud. av.*, São Paulo, 16 (44), 99-123, 2002.
- Fisch, G. F., Marengo, J. A. and Nobre, C. A.: Uma revisão geral sobre o Clima da Amazônia. *Acta Amazonica*, 28, 101-126, 1998.
- 350 Freitas, S. R., Longo, K. M., Alonso, M. F., Pirre, M., Marecal, V., Grell, G., Stockler, R., Mello, R. F., and Sánchez Gácita, M.: PREP-CHEM-SRC – 1.0: a preprocessor of trace gas and aerosol emission fields for regional and global atmospheric chemistry models, *Geosci. Model Dev.*, 4, 419-433, <https://doi.org/10.5194/gmd-4-419-2011>, 2011.
- Freud, E., Rosenfeld, D., Andreae, M. O., Costa, A. A., and Artaxo, P.: Robust relations between CCN and the vertical evolution of cloud drop size distribution in deep convective clouds, *Atmos. Chem. Phys.*, 8, 1661-1675, [https://doi.org/10.5194/acp-8-](https://doi.org/10.5194/acp-8-1661-2008)  
355 1661-2008, 2008.
- Gallardo, L., Escribano, J., Dawidowski, L., Rojas, N., Andrade, F.M. and Osses, M.: Evaluation of vehicle emission inventories for carbon monoxide and nitrogen oxides for Bogota, Buenos Aires, Santiago, and São Paulo. *Atmos. Environ.* 47, 12-19. <http://dx.doi.org/10.1016/j.atmosenv.2011.11.051>, 2012.
- Hudda, N., Fruin, S., Delfino, R. J., and Sioutas, C.: Efficient determination of vehicle emission factors by fuel use category using on-road measurements: downward trends on Los Angeles freight corridor I-710, *Atmos. Chem. Phys.*, 13, 347-357, <https://doi.org/10.5194/acp-13-347-2013>, 2013.
- IBGE: Estimates of the resident population in Brazil and Federative Units from Brazilian Institute of Geography and Statistics., 2015.
- 365 IPCC: Climate Change. Synthesis Report. Contribution of Working Groups I, II and III to the Fifth Assessment Report of the Intergovernmental Panel on Climate Change [Core Writing Team, R.K. Pachauri and L.A. Meyer (eds.)]. IPCC, Geneva, Switzerland, 151, 2014.
- Janssens-Maenhout, G., Dentener, F., van Aardenne, J., Monni, S., Pagliari, V., Orlandini, L., Klimont, Z., Kurokawa, J., Akimoto, H., Ohara, T., Wankmüller, R., Battye, B., Grano, D., Zuber, A., and Keating, T.: EDGAR-HTAP: a harmonized gridded air pollution emission dataset based on national inventories, EUR 25229 EN Report, ISBN 978-92-79-23122-3, ISSN 1018-5593, doi:10.2788/14069, 2012.
- 370 Janssens-Maenhout, G., Crippa, M., Guizzardi, D., Dentener, F., Muntean, M., Pouliot, G., Keating, T., Zhang, Q., Kurokawa, J., Wankmüller, R., Denier van der Gon, H., Kuenen, J. J. P., Klimont, Z., Frost, G., Darras, S., Koffi, B., and Li, M.: HTAP\_v2.2: a mosaic of regional and global emission grid maps for 2008 and 2010 to study hemispheric transport of air pollution, *Atmos. Chem. Phys.*, 15, 11411-11432, <https://doi.org/10.5194/acp-15-11411-2015>, 2015
- 375 Jing, B., Wu, L., Mao, H., Gong, S., He, J., Zou, C., Song, G., Li, X., and Wu, Z.: Development of a vehicle emission inventory with high temporal-spatial resolution based on NRT traffic data and its impact on air pollution in Beijing – Part 1: Development and evaluation of vehicle emission inventory, *Atmos. Chem. Phys.*, 16, 3161-3170, doi:10.5194/acp-16-3161-2016, 2016.
- Kahn Ribeiro, S., S. Kobayashi, M. Beuthe, J. Gasca, D. Greene, D. S. Lee, Y. Muromachi, P. J. Newton, S. Plotkin, D. Sperling, R. Wit, P. J. Zhou. Transport and its infrastructure. In *Climate Change: Mitigation. Contribution of Working Group III to the Fourth Assessment Report of the Intergovernmental Panel on Climate Change* [B. Metz, O.R. Davidson, P.R. Bosch, R. Dave, L.A. Meyer (eds.)], Cambridge University Press, Cambridge, United Kingdom, 2007.
- 380 Karagulian, F., C.A. Belis, C. Francisco, C. Dora, A.M. Prüss-Ustün, S. Bonjour, H. Adair-Rohani, and M. Amann. Contributions to cities' ambient particulate matter (PM): A systematic review of local source contributions at global level. *Atmos. Environ.* 120:475–483. doi: 10.1016/j.atmosenv.2015.08.087, 2015.
- 385 Kuenen, J. J. P., Visschedijk, A. J. H., Jozwicka, M., Denier van der Gon H. A. C.: TNO-MACC\_II emission inventory; a multi-year (2003–2009) consistent high-resolution European emission inventory for air quality modelling. *Atmospheric Chemistry and Physics*, 14(20), 10963-10976, 2014.

- 390 Kuhn, U., Ganzeveld, L., Thielmann, A., Dindorf, T., Schebeske, G., Welling, M., Sciare, J., Roberts, G., Meixner, F. X., Kesselmeier, J., Lelieveld, J., Kolle, O., Ciccioli, P., Lloyd, J., Trentmann, J., Artaxo, P., and Andreae, M. O.: Impact of Manaus City on the Amazon Green Ocean atmosphere: ozone production, precursor sensitivity and aerosol load. *Atmospheric Chemistry and Physics*, 10, 19, 9251-9282, doi: 10.5194/acp-10-9251-2010, 2010.
- Lozhkina, O.V., and Lozhkin, V.N.: Estimation of road transport related air pollution in Saint Petersburg using European and Russian calculation models. *Transport. Res. Part D Transport Environ.* 36: 178–189. doi: 10.1016/j.trd.2015.02.013, 2015.
- 395 Marengo, J. A. and Espinoza, J. C.: Extreme seasonal droughts and floods in Amazonia: causes, trends and impacts. *Int. J. Climatol.* doi: 10.1002/joc.4420, 2015.
- Martin, S. T., Andreae, M. O., Artaxo, P., Baumgardner, D., Chen, Q., Goldstein, A. H., Guenther, A., Heald, C. L., MayolBracero, O. L., McMurry, P. H., Pauliquevis, T., Pöschl, U., Prather, K. A., Roberts, G. C., Saleska, S. R., Silva-Dias, M. A., Spracklen, D. V., Swietlicki, E., and Trebs, I.: Sources and properties of Amazonian aerosol particles, *Rev. Geophys.*, 48, RG 2002, doi:10.1029/2008RG000280, 2010.
- 400 Martin, S. T., Artaxo, P., Machado, L., Manzi, A. O., Souza, R. A., Schumacher, C., Wang, J., Biscaro, T., Brito, J., Calheiros, A., Jardine, K., Medeiros, A., Portela, B., Sa, S. S. de, Adachi, K., Aiken, A. C., Albrecht, R., Alexander, L., Andreae, M. O., Barbosa, H. M., Buseck, P., Chand, D., Comstock, J. M., Day, D. A., Dubey, M., Fan, J., Fast, J., Fisch, G., Fortner, E., Giangrande, S., Gilles, M., Goldstein, A. H., Guenther, A., Hubbe, J., Jensen, M., Jimenez, J. L., Keutsch, F. N., Kim, S., Kuang, C., Laskin, A., McKinney, K., Mei, F., Miller, M., Nascimento, R., Pauliquevis, T., Pekour, M., Peres, J., Petaja, T., Pohiker, C., 405 Poschi, U., Rizzo, L., Schmid, B., Shilling, J. E., Silva Dias, M. A., Smith, J. N., Tomlinson, J. M., Tota, J., and Wendisch, M.: The Green Ocean Amazon Experiment (GoAmazon2014/5) Observes Pollution Affecting Gases, Aerosols, Clouds, and Rainfall over the Rain Forest. *Bulletin of the American Meteorological Society*, 10.1175/bams-d-15-00221.1, 2016.
- Martins, J. A. and Silva Dias, M. A. F.: The impact of smoke from forest fires on the spectral dispersion of cloud droplet size distributions in the Amazonian region, *Environ. Res. Lett.*, 4, 015002, doi:10.1088/1748-9326/4/1/015002, 2009.
- 410 Martins, L. D., Andrade, M. F., Freitas, E. D., Pretto, A., Gatti, L. V., Albuquerque, E. L., Tomaz, E., Guardani, M. L., Martins, M. H. R. B. and Junior, O. M. A.: Emission factors for gas-powered vehicles traveling through Road tunnels in São Paulo City, Brasil. *Environmental Science & Technology*, 40, 6722-6729, 2006.
- Medeiros, A. S. S., Calderaro, G., Guimarães, P. C., Magalhaes, M. R., Morais, M. V. B., Rafee, S. A. A., Ribeiro, I. O., Andreoli, R. V., Martins, J. A., Martins, L. D., Martin, S. T., and Souza, R. A. F.: Power plant fuel switching and air quality in a 415 tropical, forested environment, *Atmos. Chem. Phys.*, 17, 8987-8998, <https://doi.org/10.5194/acp-17-8987-2017>, 2017.
- MMA.: 1º Inventário Nacional de Emissões Atmosféricas Por Veículos Automotores Rodoviários, first ed. Ministério do Meio Ambiente, Brasília, Brasil, 2011.
- Nagpure, A. S., and Gurjar, B. R.: Development and evaluation of vehicular air pollution inventory model. *Atmos. Environ.* 59:160–169. doi: 10.1016/j.atmosenv.2012.04.044, 2012.
- 420 Nobre, P., Malagutti, M., Urbano, D. F., de Almeida, R. A. F. and Giarolla, E.: Amazon deforestation and climate change in a coupled model simulation, *J. Clim.*, 22, 5686–5697, 2009.
- Puliafito, S. E., Allende, D. G., Castesana, P. S. and Ruggeri, M. F.: High-resolution atmospheric emission inventory of the argentine energy sector. Comparison with edgar global emission database, *Heliyon*, 3 (12), Article e00489, ISSN 2405-8440, <https://doi.org/10.1016/j.heliyon.2017.e00489>, 2017.
- 425 Puliafito, S. E., Allende, D. G., Pinto, S. and Castesana, P. S.: High Resolution Inventory of GHG Emissions of the Road Transport Sector in Argentina *Atmospheric Environ.*, 101, 303-311, 2015.
- Ramanathan, V., Crutzen, P. J., Kiehl, J. T. and Rosenfeld, D.: Atmosphere – Aerosols, Climate, and the Hydrological Cycle. *Science* 294: 2119-2124, 2001.
- 430 Réquia, W. J., Koutrakis, P. and Roig, H. L.: Spatial distribution of vehicle emission inventories in the Federal District, Brazil. *Atmos. Environ.* 112:32–39. doi:10.1016/j.atmosenv.2015.04.029, 2015.

- Rizzo, L. V., Artaxo, P., Müller, T., Wiedensohler, A., Paixão, M., Cirino, G. G., Arana, A., Swietlicki, E., Roldin, P., Fors, E. O., Wiedemann, K. T., Leal, L. S. M., and Kulmala, M.: Long term measurements of aerosol optical properties at a primary forest site in Amazonia, *Atmos. Chem. Phys.*, 13, 2391-2413, doi:10.5194/acp-13-2391-2013, 2013.
- 435 Roberts, G. C., Nenes, A., Seinfeld, J. H. and Andreae, M. O.: Impact of biomass burning on cloud properties in the Amazon Basin, *J. Geophys. Res.*, 108, 4062, doi:10.1029/2001JD000985, 2003.
- Rogelj, J., den Elzen, M., Höhne, N., Fransen, T., Fekete, H., Winkler, H., Schaeffer, R., Sha, F., Riahi, K. and Meinshausen, M.: Paris Agreement climate proposals need a boost to keep warming well below 2°C. *Nature* 534: 631-639. doi:10.1038/nature18307, 2016.
- 440 Santos, M. J., Silva Dias, M. A. and Freitas, E. D.: Influence of local circulations on wind, moisture, and precipitation close to Manaus City, Amazon Region, Brazil. *Journal of Geophysical Research*, 2014.
- Scovronick, N., França, D., Alonso, M., Almeida, C., Longo, K., Freitas, S., Rudorff, B. and Wilkinson, P.: Air Quality and Health Impacts of Future Ethanol Production and Use in São Paulo State, Brazil. *Int. J. Environ. Res. Public Health*. 13:695. doi: 10.3390/ijerph13070695, 2016.
- 445 Silva, K. L. A., Alonso, M. F. and Oliveira, L.: Analysis of Mobile Sources Atmospheric Emissions in Pelotas City. *Ciência e Natura*, 38, 347-353, 2016.
- Sims, R., Schaeffer, R., Creutzig, F., Cruz-Núñez, X., D'Agosto, M., Dimitriu, D., Figueroa Meza, M. J., Fulton, L., Kobayashi, S., Lah, O., McKinnon, A., Newman, P., Ouyang, M., Schauer, J. J., Sperling, D. and Tiwari, G.: Transport. In: *Climate Change 2014: Mitigation of Climate Change. Contribution of Working Group III to the Fifth Assessment Report of the Intergovernmental Panel on Climate Change* [Edenhofer, O., Pichs-Madruga, R., Sokona, Y., Farahani, E., Kadner, S., Seyboth, K., Adler, A., Baum, I., Brunner, S., Eickemeier, P., Kriemann, B., Savolainen, J., Schlömer, S., von Stechow, C., Zwickel, T. and Minx, J. C. (eds.)]. Cambridge University Press, Cambridge, United Kingdom and New York, NY, USA, 2014.
- 450 Sokhi, R. S.: *World Atlas of Atmospheric Pollution*. Edited by Ranjeet S. Sokhi. 1st ed. Nova York: Anthen press, 2011.
- Song, X. Y. and Xie, S. D.: Development of vehicle emission inventory in China, *Environb. Sci.*, 27, 1041-1045, 2006.
- 455 Soylu, S.: Estimation of Turkish road transport emissions, *Energy Policy*, 35 (8), 4088-4094, ISSN 0301-4215, <http://dx.doi.org/10.1016/j.enpol.2007.02.015>, 2007.
- Stanley, J. K., Hensher, D. A. and Loader, C.: Road transport and climate change: Stepping off the greenhouse gas. *Transportation Research Part A: Policy and Practice* 45.10, 1020-1030, 2011.
- 460 Trebs, I., Mayol-Bracero, O. L., Pauliquevis, T., Kuhn, U., Sander, R. and Ganzeveld, L: Impact of the Manaus urban plume on trace gas mixing ratios near the surface in the Amazon Basin: Implications for the NO-NO<sub>2</sub>-O<sub>3</sub> photostationary state and peroxy radical levels, *J. Geophys. Res.*, 117, D05307, 2012.
- Trombetti, M., Pisoni, E., Lavallo, C.: Downscaling methodology to produce a high resolution gridded emission inventory to support local/city level air quality policies, *EUR 28428 EN*, doi:10.2760/51058, 2017.
- Ueda, A.C. and Tomaz, E.: Inventário de emissão de fontes veiculares da região metropolitana de Campinas, São Paulo. *Quim. Nova* 34 (9), 1496-1500, 2011.
- 465 UNEP. The Emissions Gap Report 2017. United Nations Environment Programme (UNEP), Nairobi, 2017.
- Vara-Vela, A., Andrade, M. F., Kumar, P., Ynoue, R. Y., and Muñoz, A. G.: Impact of vehicular emissions on the formation of fine particles in the Sao Paulo Metropolitan Area: a numerical study with the WRF-Chem model, *Atmos. Chem. Phys.*, 16, 777-797, doi:10.5194/acp-16-777-2016, 2016.
- Vasconcellos, E.A.: *Transporte e Meio Ambiente*, first ed. Annablume, São Paulo, p. 200, 2006.
- 470 Venegas, L. E., Mazzeo, N. A. and Rojas, A. L. P.: Evaluation of an Emission Inventory and Air Pollution in the Metropolitan Area of Buenos Aires, *Air Quality-Models and Applications*, Prof. Dragana Popovic (Ed.), InTech, doi: 10.5772/18767, 2011.

- Vivanco, M. G. and Andrade, M. F.: Validation of the emission inventory in the Sao Paulo Metropolitan Area of Brazil, based on ambient concentrations ratios of CO, NMOG and NO<sub>x</sub> and on a photochemical model. *Atmospheric Environ.*, 40 (7), 1189-1198, 2006.
- 475 Wang, H., and Fu, R.: The influence of Amazon rainfall on the Atlantic ITCZ through convectively coupled Kelvin waves. *J. Climate*, 20, 1188–1201, 2007.
- Yoshizaki, K., Brito, J. M., Silva, L. F., Franco, A. L. dos S., Frias, D. P., e Silva, R. C. R., Lourenço, L. F. A., Saldiva, P. H. N., Tibério, I. de F. L. C., Mauad, T. and Macchione, M.: The effects of particulate matter on inflammation of respiratory system: Differences between male and female. *Science of the Total Environment*, 586, 15, 2017.
- 480 Zhou, Y., Cheng, S., Chen, D., Lang, J., Zhao, B. and Wei, W.: A new statistical approach for establishing high-resolution emission inventory of primary gaseous air pollutants. *Atmos. Environ.* 94, 392-401. <http://dx.doi.org/10.1016/j.atmosenv.2014.05.047>, 2014.
- Zhou, Y., Zhao, Y., Mao, P., Zhang, Q., Zhang, J., Qiu, L. and Yang, Y.: Development of a high-resolution emission inventory and its evaluation and application through air quality modeling for Jiangsu Province, China, *Atmos. Chem. Phys.*, 17, 211-233, doi:10.5194/acp-17-211-2017, 2017.
- 485

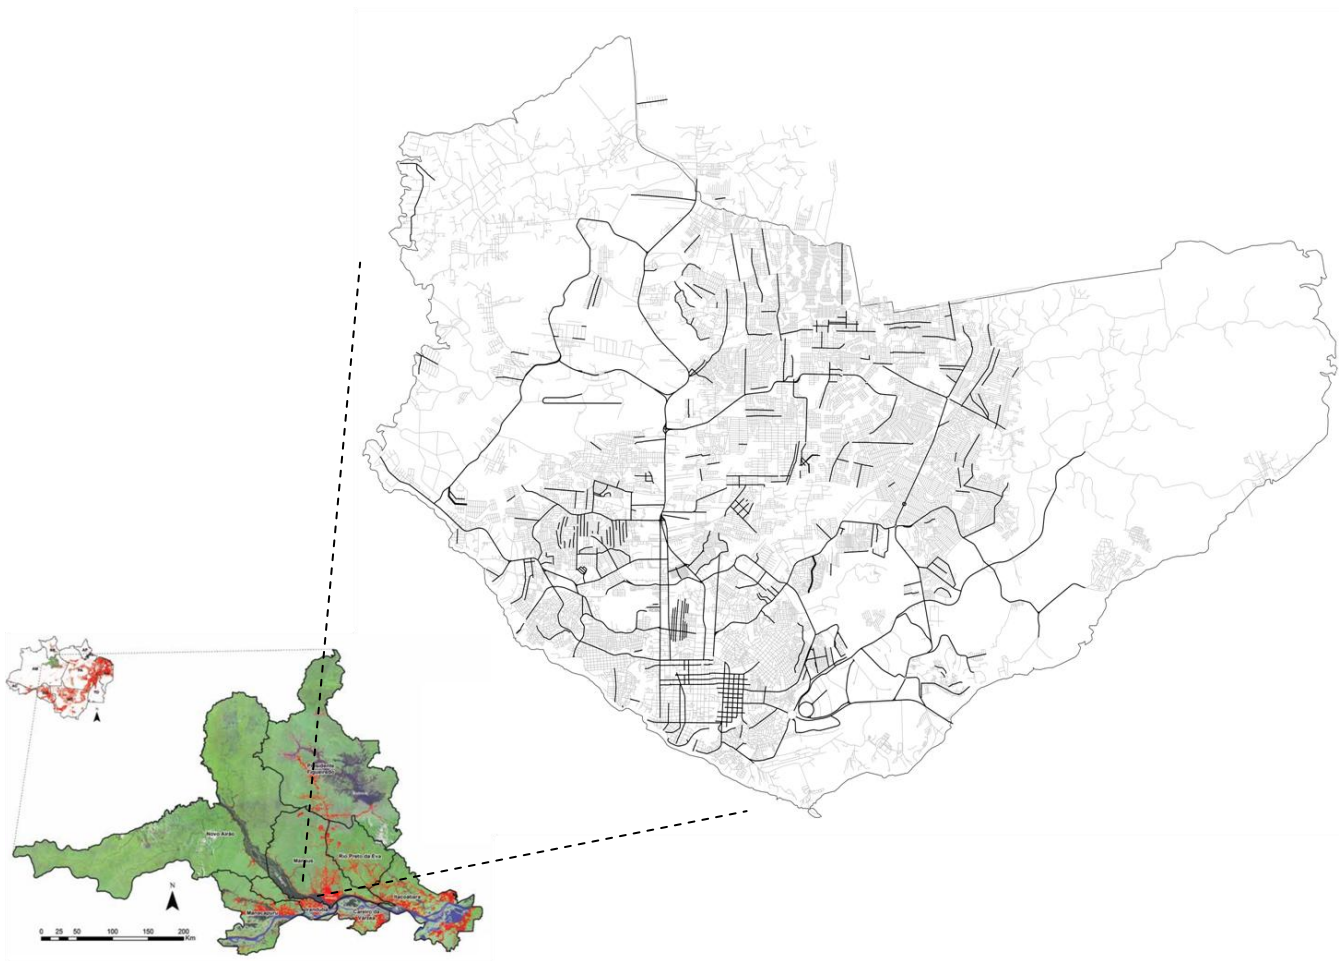

Figure 1. Area of study. Left map represents the metropolitan region of Manaus (areas in green represent forest cover and dark lines are the municipal boundaries; area in red represents deforestation accumulated until March 2014). The map in the upper-right corner shows urban area of Manaus. The black lines represent the main roads, and grey lines are small roads.



500

505

**Table 1. Emission factors (g km<sup>-1</sup>) for the total number of vehicles per category (Cancelli and Dias, 2014).**

|                 | light vehicles | motorcycles | bus | trucks |
|-----------------|----------------|-------------|-----|--------|
| CO              | 1.2            | 3           | 1.1 | 1      |
| NO <sub>x</sub> | 0.4            | 0.15        | 0.5 | 0.4    |
| CH <sub>4</sub> | 0.15           | 0.1         | 0   | 0      |
| MP              | 0.015          | 0.01        | 0.2 | 0.15   |
| CO <sub>2</sub> | 210            | 210         | 445 | 445    |
| NMHC            | 0.4            | 0.5         | 9   | 5      |

510

**Table 2. Descriptive statistics for pollutant vehicle emission (kg /h) of total number of vehicles per category for the urban area of Manaus, comprising of 258 roads.**

|                |                       | CO       | NO <sub>x</sub> | CH <sub>4</sub> | PM     | CO <sub>2</sub> | NMHC     |
|----------------|-----------------------|----------|-----------------|-----------------|--------|-----------------|----------|
| light vehicles | Average               | 10.108   | 3.369           | 1.263           | 0.126  | 1768.815        | 3.369    |
|                | standard deviation    | 16.006   | 5.335           | 2.001           | 0.200  | 2801.024        | 5.335    |
|                | variation coefficient | 1.584    | 1.584           | 1.584           | 1.584  | 1.584           | 1.584    |
|                | Minimum               | 0.138    | 0.046           | 0.017           | 0.002  | 24.234          | 0.046    |
|                | Maximum               | 151.006  | 50.335          | 18.876          | 1.888  | 26426.006       | 50.335   |
|                | Total                 | 2607.739 | 869.246         | 325.967         | 32.597 | 456354.276      | 869.246  |
| Motorcycles    |                       | CO       | NO <sub>x</sub> | CH <sub>4</sub> | PM     | CO <sub>2</sub> | NMHC     |
|                | Average               | 5.196    | 0.260           | 0.173           | 0.017  | 363.714         | 0.866    |
|                | standard deviation    | 7.554    | 0.378           | 0.252           | 0.025  | 528.754         | 1.259    |
|                | variation coefficient | 1.454    | 1.454           | 1.454           | 1.454  | 1.454           | 1.454    |
|                | Minimum               | 0.063    | 0.003           | 0.002           | 0.000  | 4.406           | 0.010    |
|                | Maximum               | 55.247   | 2.762           | 1.842           | 0.184  | 3867.309        | 9.208    |
|                | Total                 | 1340.545 | 67.027          | 44.685          | 4.468  | 93838.161       | 223.424  |
| Bus            |                       | CO       | NO <sub>x</sub> | CH <sub>4</sub> | PM     | CO <sub>2</sub> | NMHC     |
|                | Average               | 0.550    | 0.250           | *               | 0.100  | 222.525         | 4.501    |
|                | standard deviation    | 0.917    | 0.417           | *               | 0.167  | 371.092         | 7.505    |
|                | variation coefficient | 1.668    | 1.668           | *               | 1.668  | 1.668           | 1.668    |
|                | Minimum               | 0.008    | 0.004           | *               | 0.001  | 3.175           | 0.064    |
|                | Maximum               | 8.359    | 3.800           | *               | 1.520  | 3381.649        | 68.393   |
|                | Total                 | 141.916  | 64.507          | *               | 25.803 | 57411.443       | 1161.130 |
| Trucks         |                       | CO       | NO <sub>x</sub> | CH <sub>4</sub> | PM     | CO <sub>2</sub> | NMHC     |
|                | Average               | 0.241    | 0.096           | *               | 0.036  | 107.284         | 1.205    |
|                | standard deviation    | 0.484    | 0.194           | *               | 0.073  | 215.360         | 2.420    |
|                | variation coefficient | 2.007    | 2.007           | *               | 2.016  | 2.007           | 2.007    |
|                | Minimum               | 0.002    | 0.001           | *               | 0.000  | 0.809           | 0.009    |
|                | Maximum               | 5.616    | 2.246           | *               | 0.842  | 2498.939        | 28.078   |
|                | Total                 | 62.201   | 24.880          | *               | 9.330  | 27679.313       | 311.004  |

515 | Note: \* not calculated

520

525 **Table 3. Summary of the contributions, in percentages, from air pollutant emission for each vehicle type, for urban area**  
**of Manaus, comprising of 258 roads.**

| Vehicle category | CO (%) | NO <sub>x</sub> (%) | CH <sub>4</sub> (%) | PM (%) | CO <sub>2</sub> (%) | NMHC (%) |
|------------------|--------|---------------------|---------------------|--------|---------------------|----------|
| light vehicles   | 62.80  | 84.75               | 87.94               | 45.15  | 71.83               | 33.89    |
| Motorcycles      | 32.28  | 6.54                | 12.06               | 6.19   | 14.77               | 8.71     |
| Bus              | 3.42   | 6.29                | *                   | 35.74  | 9.04                | 45.27    |
| Trucks           | 1.50   | 2.43                | *                   | 12.92  | 4.36                | 12.13    |
| Total            | 100    | 100                 | 100                 | 100    | 100                 | 100      |

| Note: \* not calculated

530

535

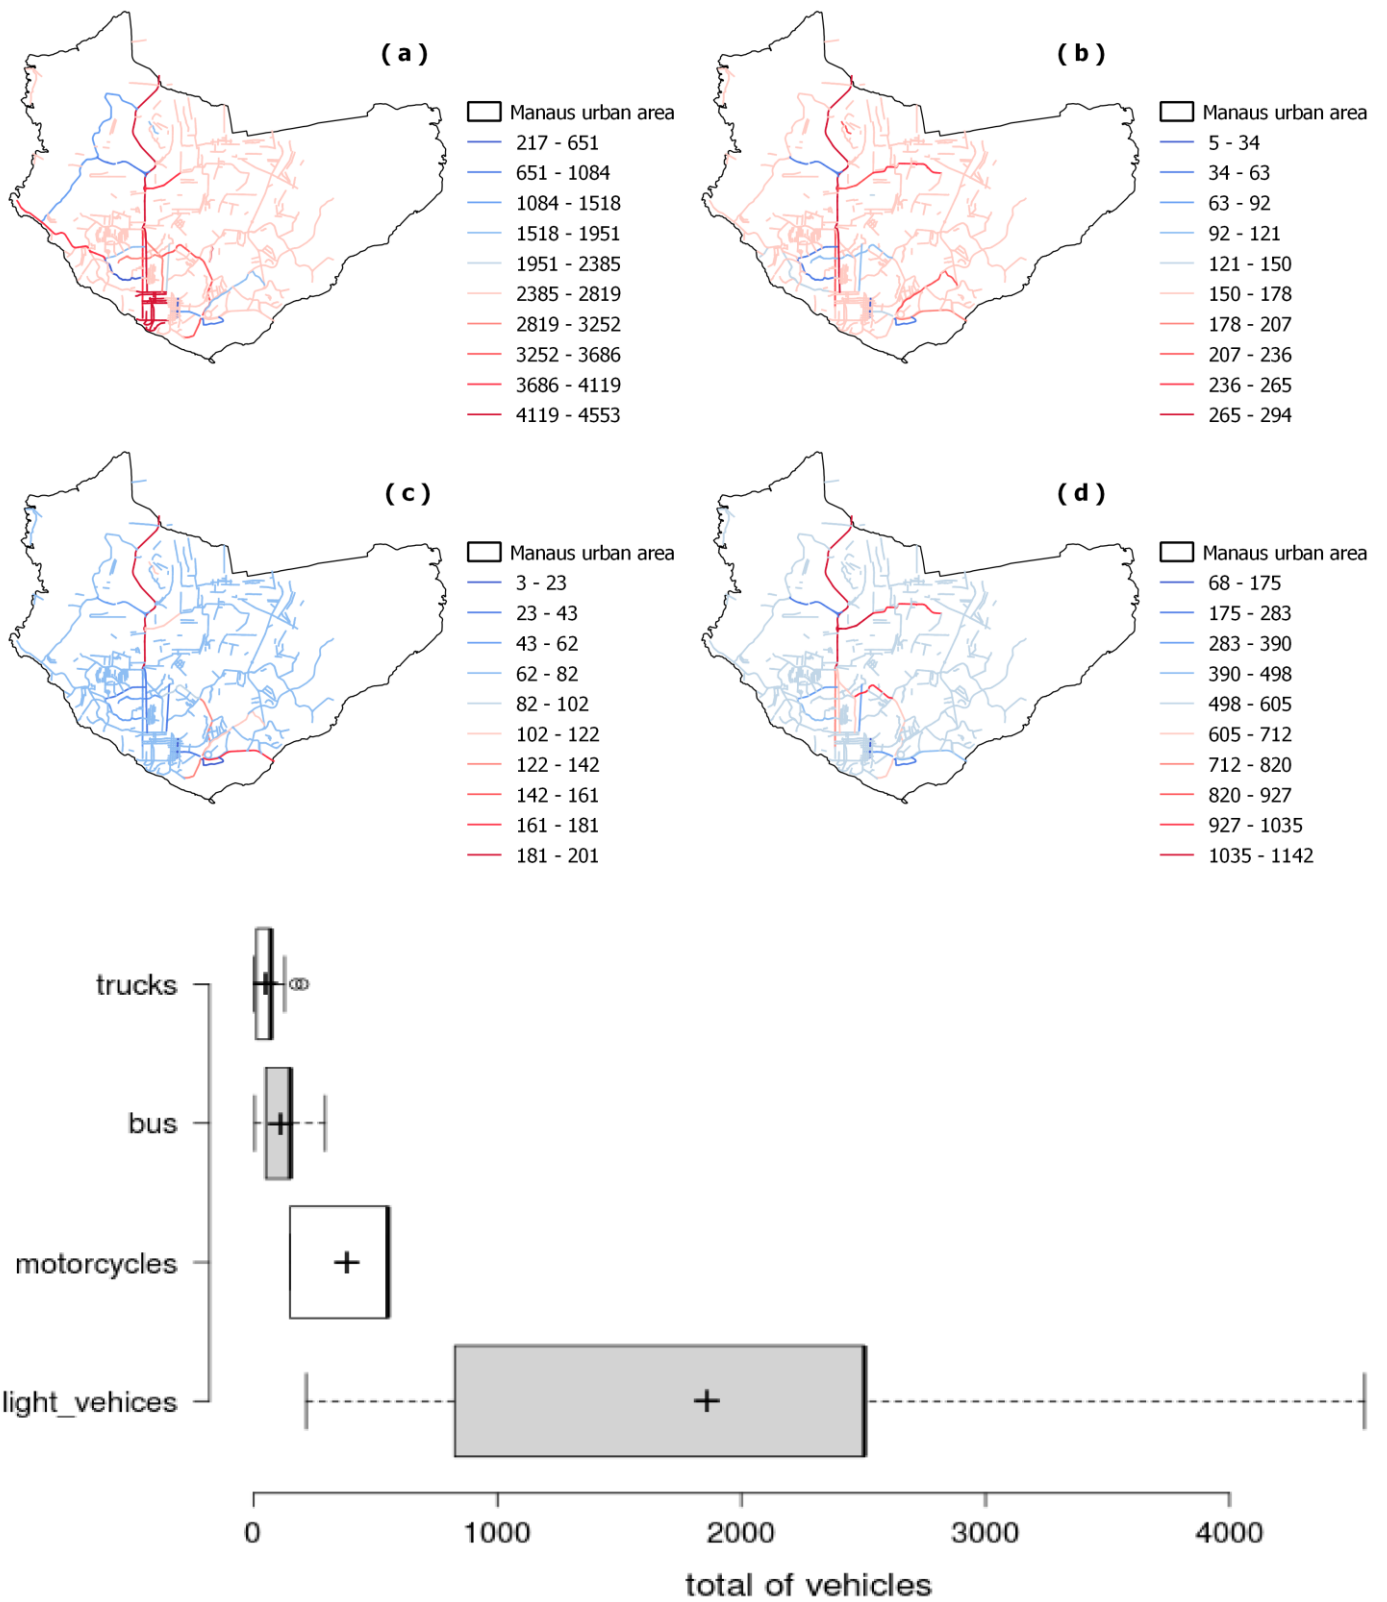

Figure 2. The top panel shows the mean spatial distribution of traffic density (vehicles/hr) along Manaus urban area main roads for each vehicle category, respectively: light vehicles (a); bus (b); trucks (c); motorcycles (d). The bottom panel shows the boxplot for each vehicle category. Upper and lower whiskers represent 1.5 interquartile ranges for the period, from the 25th and 75th percentiles; outliers are represented by dots. The crosses represent sample median value and the black square is the average value.

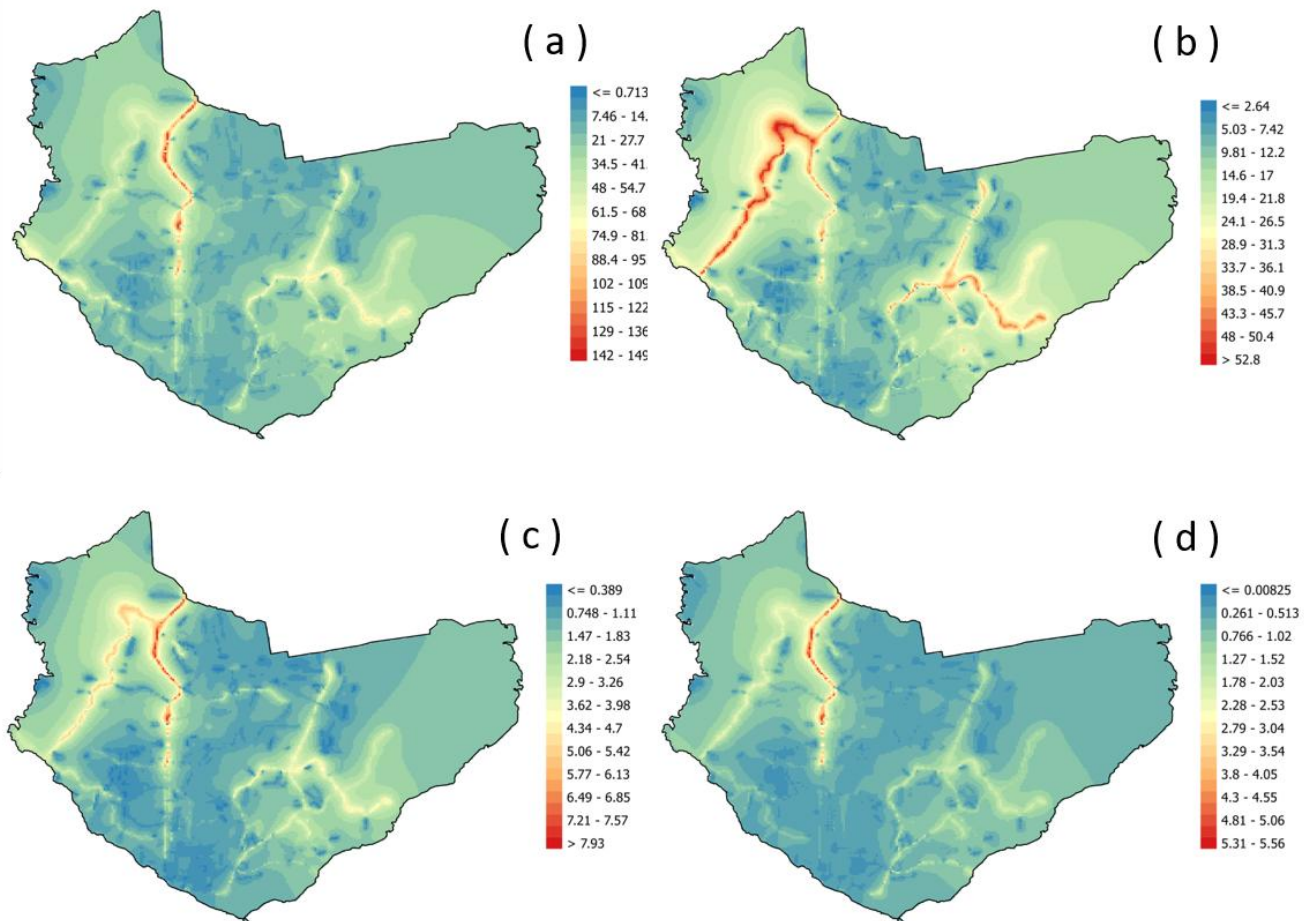

Figure 3. Grid-based vehicle emission inventory of CO at Manaus urban area for each vehicle category in  $\text{kg h}^{-1}$ , respectively: light vehicles (a); motorcycles (b); bus (c); trucks (d).

550

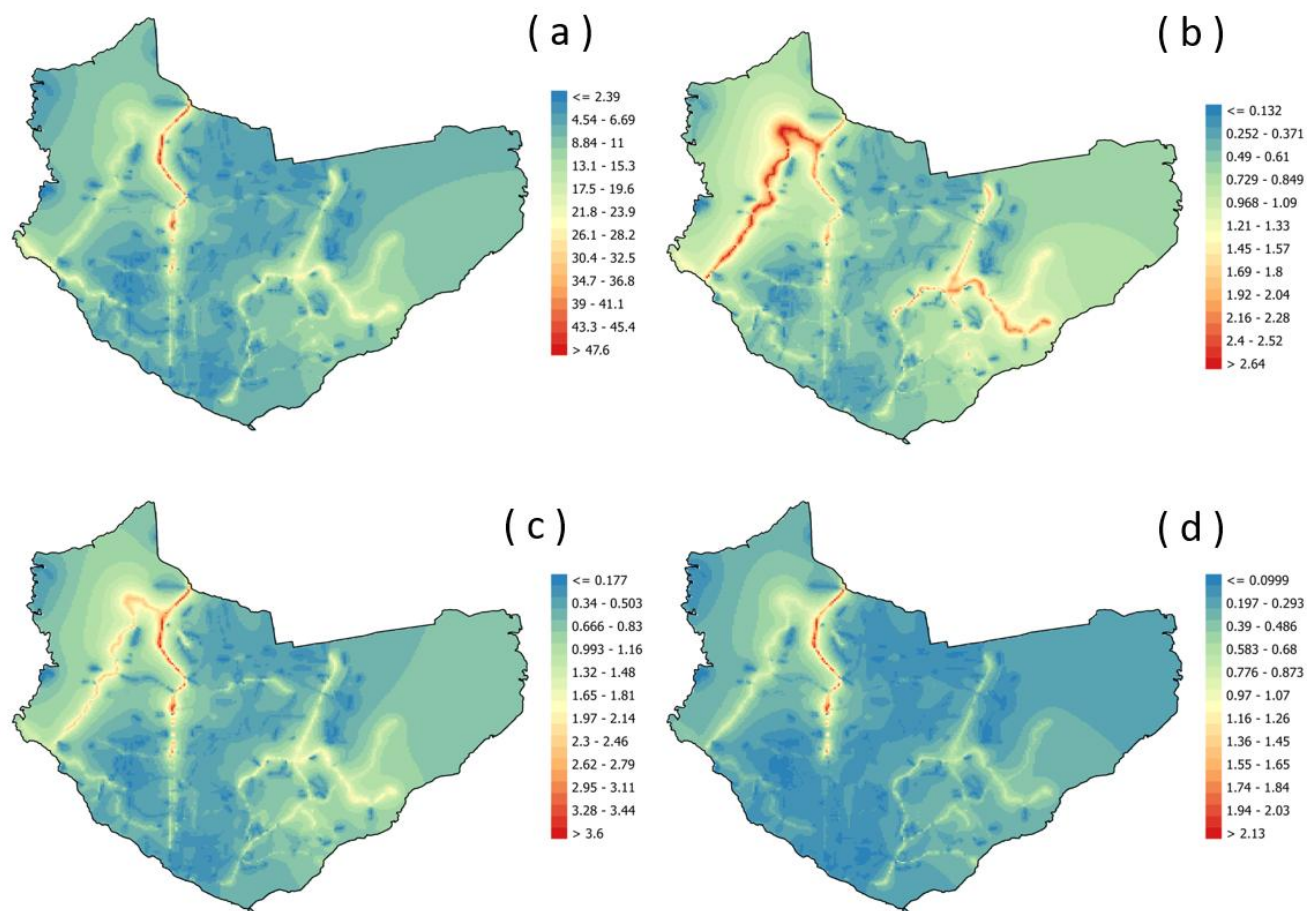

555 **Figure 4.** Grid-based vehicle emission inventory of  $\text{NO}_x$  at Manaus urban area for each vehicle category in  $\text{kg h}^{-1}$ , respectively: light vehicles (a); motorcycles (b); bus (c); trucks (d).



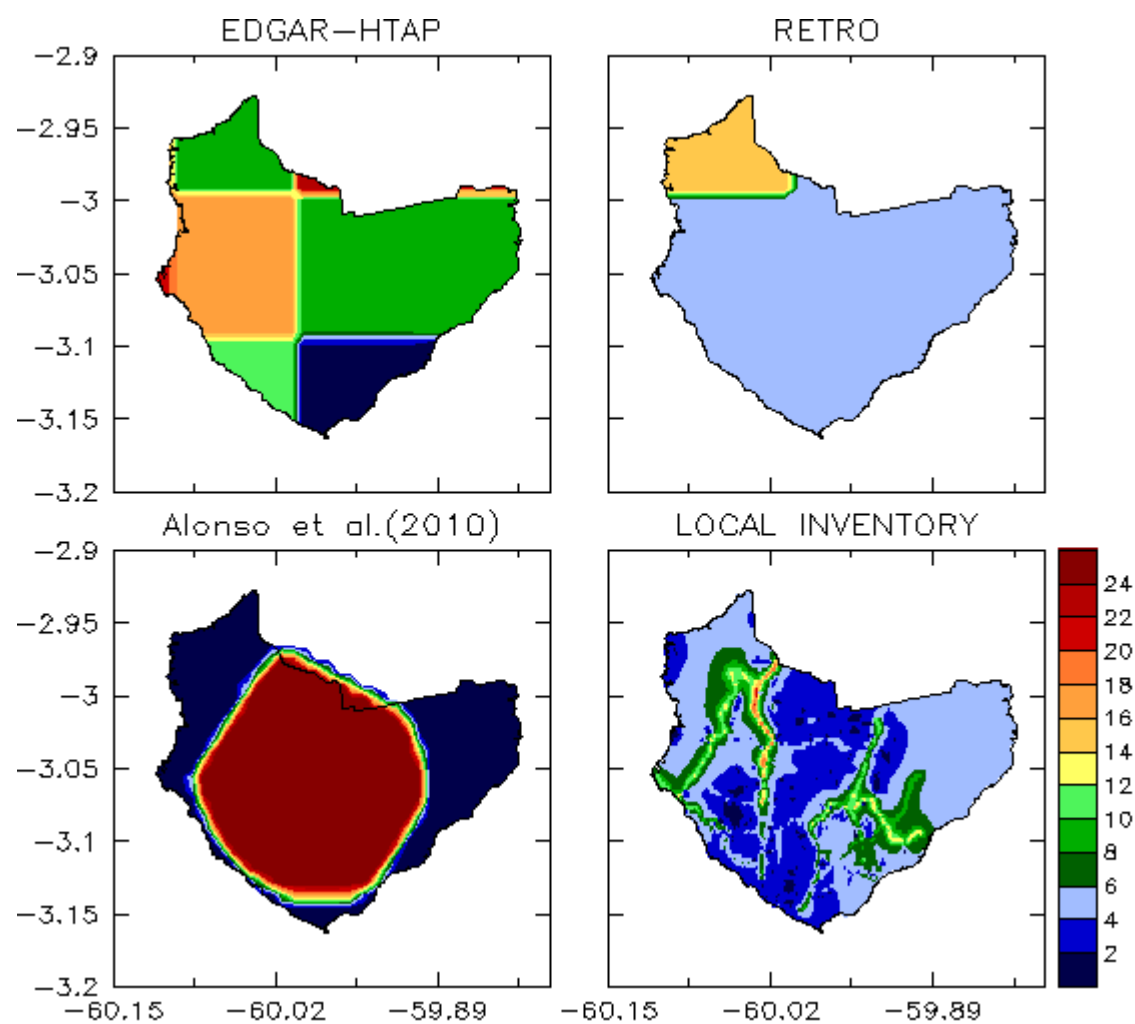

560 | Figure 5. Spatial distribution of CO ( $10^{-6} \text{ kg m}^{-2} \text{ day}^{-1}$ ) in the urban area of Manaus.
